# Supplementary material for: Fine-tuning the pore structure of metal–organic frameworks by linker substitution for enhanced hydrogen storage and gas separation
Source: Royal Society of Chemistry journal article supplement (doi:10.1039/d1ce00087j), 2021-01-01
Supplement: d1ce00087j1.pdf [file d1ce00087j1.pdf]

## Supplementary Information

### Fine-Tuning Pore Structure of Metal–Organic Frameworks by Linker Substitution for Enhanced Hydrogen Storage and Gas Separation

Xiwei Han,<sup>ab</sup> Xiaoxian Yang,<sup>c</sup> Chuan Yu,<sup>ab</sup> Shuyan Lu,<sup>ab</sup> Ehsan Sadeghi Pouya,<sup>c</sup> Peng Bai,<sup>ab</sup> Jiafei

Lyu<sup>\*ab</sup> and Xianghai Guo<sup>\*abd</sup>

<sup>a</sup>Dept. of Pharmaceutical Engineering, School of Chemical Engineering and Technology, Tianjin University, Tianjin 300350, P. R. China

<sup>b</sup>Key Laboratory of Systems Bioengineering, Ministry of Education, Tianjin University, Tianjin, 300072, P. R. China

<sup>c</sup>Fluid Science & Resources Division, Department of Chemical Engineering, University of Western Australia, Crawley, WA 6009, Australia

<sup>d</sup>School of Marine Science and Technology, Tianjin University, Tianjin 300072, P. R. China

\* Corresponding authors: [guoxh@tju.edu.cn](mailto:guoxh@tju.edu.cn)

[jflv@tju.edu.cn](mailto:jflv@tju.edu.cn)

## **Structure Simulation**

All simulated structures are based on the given crystallographic topology of UiO-66 to be built. By modifying benzene rings of the organic linkers (terephthalic acid) in Materials Studio,<sup>1</sup> substituents (dihydroxy, dimethoxy and diethoxy groups) are introduced to the crystallographic topology. The geometry of the output MOFs is optimized using a molecular mechanics (MM) simulation in which the system energy is minimized as a function of the atomic coordinates. The system energy is derived by a force-field which describes the energetics of MOF intramolecular interactions. Here, we used the “Geometry Optimization” to describe the energetics of MOF intramolecular interactions with Materials Studio to perform the MM simulation. We optimized the atom positions and unit cell parameters together to obtain the structures. Finally, we refined the structures by conducting Pawley refinement of the experimental powder X-ray diffraction patterns with the Reflex Module of Materials Studio.

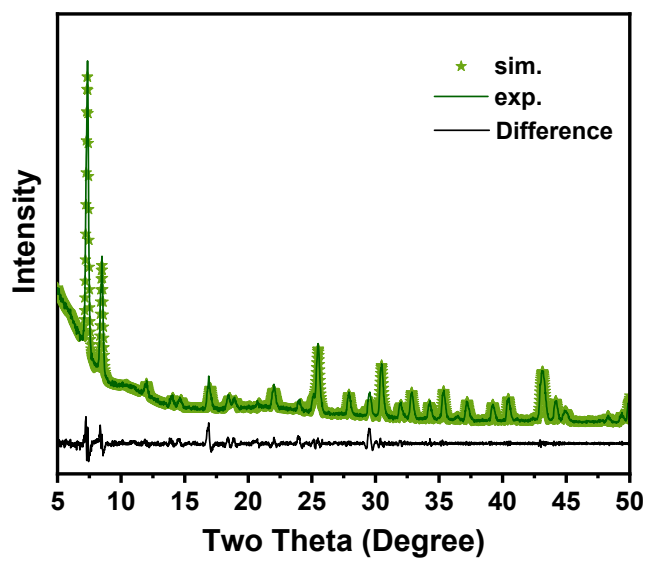

**Fig. S1.** Pawley refinement result of UiO-66-(OH)<sub>2</sub>.

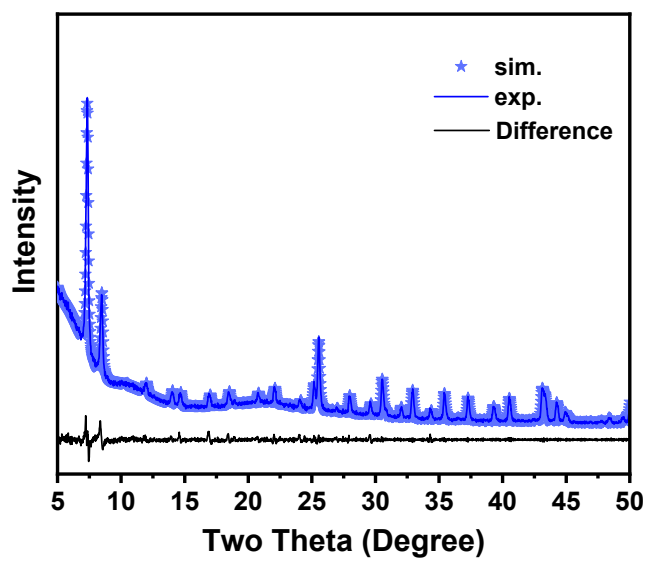

**Fig. S2.** Pawley refinement result of UiO-66-(OCH<sub>3</sub>)<sub>2</sub>.

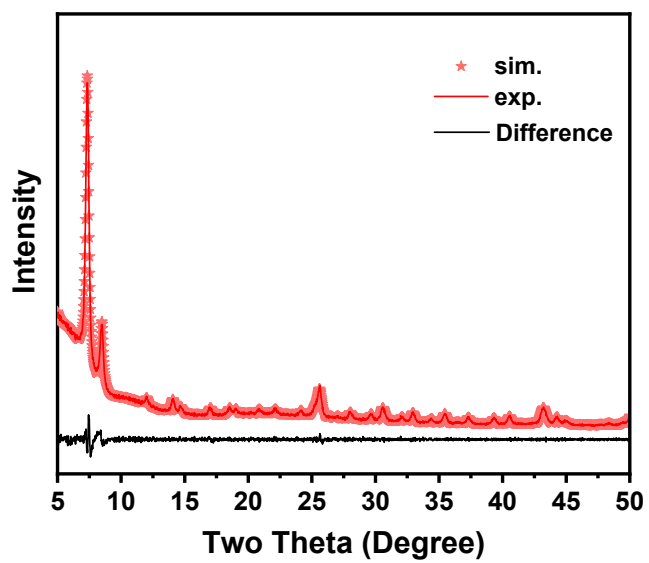

**Fig. S3.** Pawley refinement result of UiO-66-(OCH<sub>2</sub>CH<sub>3</sub>)<sub>2</sub>.

**Table S1.** Summary of Pawley refinement results of the MOFs.

| MOFs                                                    | Cell Volume (Å <sup>3</sup> ) | Pore Volume (cm <sup>3</sup> /g) | BET Surface Area (m <sup>2</sup> /g) | Octahedral Channel (Å) | Tetrahedral Channel (Å) | Window (Å) | Rwp (%) |
|---------------------------------------------------------|-------------------------------|----------------------------------|--------------------------------------|------------------------|-------------------------|------------|---------|
| UiO-66-(OH) <sub>2</sub>                                | 9057                          | 0.35                             | 795                                  | 12.5                   | 10.0                    | 7.3        | 4.48    |
| UiO-66-(OCH <sub>3</sub> ) <sub>2</sub>                 | 9137                          | 0.23                             | 492                                  | 9.5                    | 7.5                     | 4.4        | 4.93    |
| UiO-66-(OCH <sub>2</sub> CH <sub>3</sub> ) <sub>2</sub> | 9091                          | 0.06                             | 202                                  | 7.5                    | 7.0                     | 3.8        | 3.78    |

**Table S2.** Textual properties of UiO-66, UiO-66-(OH)<sub>2</sub>, UiO-66-(OCH<sub>3</sub>)<sub>2</sub> and UiO-66-(OCH<sub>2</sub>CH<sub>3</sub>)<sub>2</sub>.

| MOFs                                                    | S <sub>BET</sub> (m <sup>2</sup> ·g <sup>-1</sup> ) | V <sub>Tot</sub> (cm <sup>3</sup> ·g <sup>-1</sup> ) | V <sub>Micro</sub> (cm <sup>3</sup> ·g <sup>-1</sup> ) | D <sub>av</sub> (nm) |
|---------------------------------------------------------|-----------------------------------------------------|------------------------------------------------------|--------------------------------------------------------|----------------------|
| UiO-66                                                  | 1564                                                | 1.00                                                 | 0.62                                                   | 1.63                 |
| UiO-66-(OH) <sub>2</sub>                                | 945                                                 | 0.69                                                 | 0.46                                                   | 0.78                 |
| UiO-66-(OCH <sub>3</sub> ) <sub>2</sub>                 | 901                                                 | 1.10                                                 | 0.37                                                   | 0.74                 |
| UiO-66-(OCH <sub>2</sub> CH <sub>3</sub> ) <sub>2</sub> | 982                                                 | 0.96                                                 | 0.31                                                   | 1.43                 |

**Table S3.** Parameters by fitting the isotherms with Langmuir model.

| MOFs                                                    | CO <sub>2</sub> |                         |                | CH <sub>4</sub> |                         |                | N <sub>2</sub> |                         |                | H <sub>2</sub> |                         |                |
|---------------------------------------------------------|-----------------|-------------------------|----------------|-----------------|-------------------------|----------------|----------------|-------------------------|----------------|----------------|-------------------------|----------------|
|                                                         | K               | Q <sub>m</sub> (mol/kg) | R <sup>2</sup> | K               | Q <sub>m</sub> (mol/kg) | R <sup>2</sup> | K              | Q <sub>m</sub> (mol/kg) | R <sup>2</sup> | K              | Q <sub>m</sub> (mol/kg) | R <sup>2</sup> |
| UiO-66                                                  | 13.1<br>1       | 1.06                    | 0.999          | 7.69            | 0.52                    | 0.999          | 4.43           | 0.36                    | 0.999          | 2.49           | 0.08                    | 0.994          |
| UiO-66-(OH) <sub>2</sub>                                | 5.74            | 3.66                    | 0.980          | 3.84            | 0.86                    | 0.996          | 3.32           | 0.26                    | 0.999          | 1.19           | 0.22                    | 0.998          |
| UiO-66-(OCH <sub>3</sub> ) <sub>2</sub>                 | 6.49            | 2.21                    | 0.992          | 3.90            | 0.61                    | 0.998          | 3.01           | 0.22                    | 0.999          | 1.73           | 0.32                    | 0.974          |
| UiO-66-(OCH <sub>2</sub> CH <sub>3</sub> ) <sub>2</sub> | 5.58            | 1.62                    | 0.992          | 4.27            | 0.32                    | 0.999          | 4.43           | 0.09                    | 0.999          | 1.85           | 0.38                    | 0.974          |

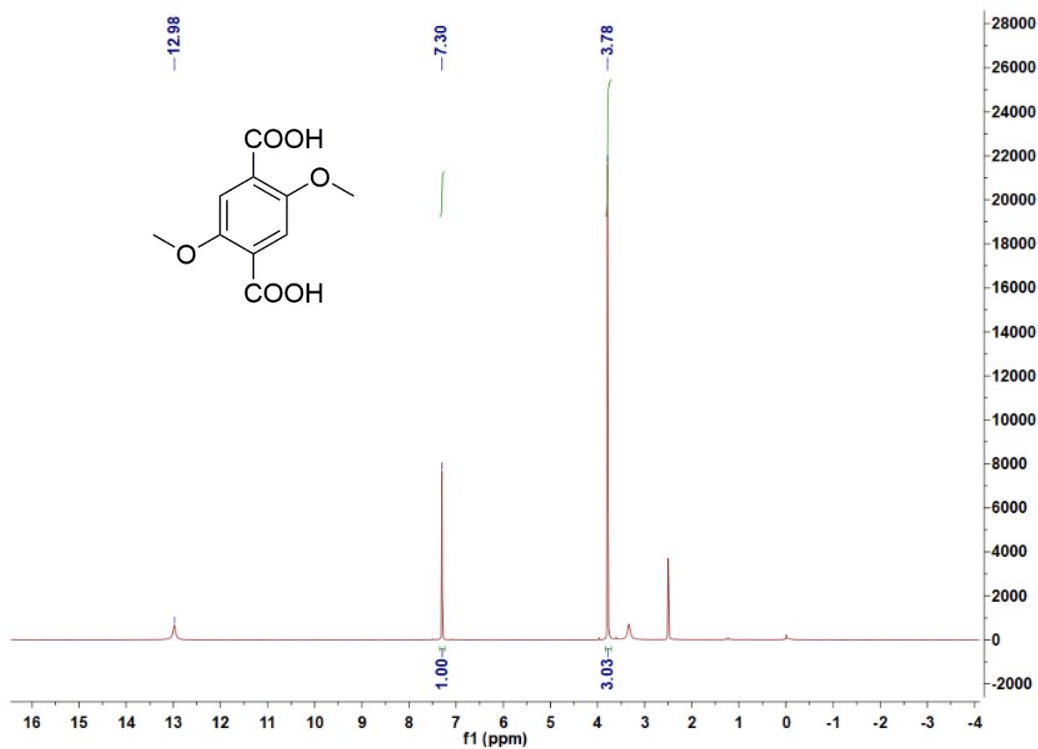

**Fig. S4.** Proton NMR (400 MHz, DMSO-*d*<sub>6</sub>) spectrum of 2,5-dimethoxy terephthalic acid (L1).

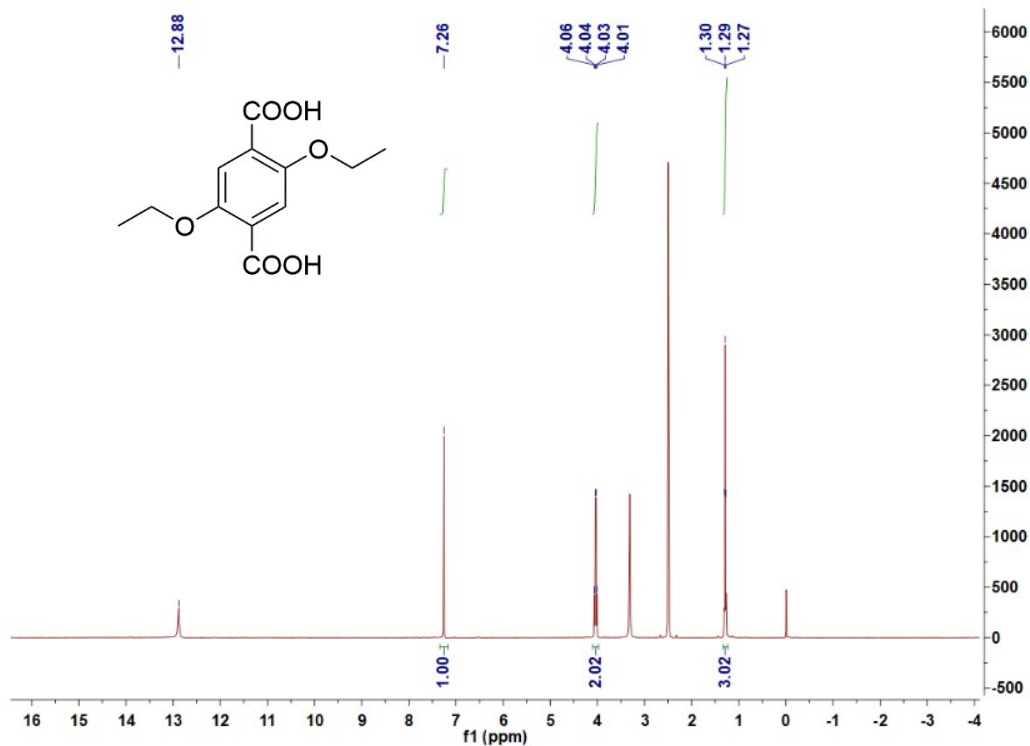

**Fig. S5.** Proton NMR (400 MHz, DMSO-*d*<sub>6</sub>) spectrum of 2,5-diethoxy terephthalic acid (L2).

**Table S4.** The hydrogen adsorption capacities of previously reported MOF materials.

| Material   | H <sub>2</sub> uptake (wt. %) | Temperature (K) | Pressure (bar) | Ref. |
|------------|-------------------------------|-----------------|----------------|------|
| CAU-1      | 4.0                           | 77              | 30             | 2    |
| BUT-22     | 12                            | 77              | 100            | 3    |
| HKUST-1    | 3.6                           | 77              | 50             | 4    |
| MOF-5      | 11.5                          | 77              | 170            | 5    |
| NU-1500-Al | 8.6                           | 77              | 100            | 6    |
| NU-1501-Al | 14.5                          | 77              | 100            | 6    |
| NU-1501-Fe | 13.2                          | 77              | 100            | 6    |
| MOF-177    | 7.5                           | 77              | 70             | 7    |
| IRMOF-6    | 4.6                           | 77              | 45             | 7    |
| IRMOF-8    | 3.4                           | 77              | 33.7           | 7    |
| SNU-4      | 3.7                           | 77              | 50             | 8    |
| SNU-5      | 5.2                           | 77              | 50             | 8    |
| SNU-6      | 10.0                          | 77              | 70             | 9    |
| Mn-BTT     | 6.9                           | 77              | 90             | 10   |
| Cu-BTT     | 3.7                           | 77              | 90             | 11   |
| Fe-BTT     | 4.1                           | 77              | 95             | 12   |
| Ni-MOF-74  | 2.95                          | 77              | 10             | 13   |
| Co-MOF-74  | 3.15                          | 77              | 10             | 13   |
| PCN-6      | 1.9                           | 77              | 1              | 14   |
| PCN-6'     | 1.1                           | 77              | 1              | 15   |
| PCN-10     | 6.84                          | 30              | 3.5            | 16   |
| PCN-12     | 3.05                          | 77              | 1              | 17   |
| PCN-12'    | 2.4                           | 77              | 1              | 17   |
| PCN-20     | 6                             | 77              | 35             | 18   |
| PCN-46     | 7.2                           | 77              | 60             | 18   |
| PCN-66     | 6.65                          | 77              | 45             | 19   |
| NOTT-140   | 6                             | 77              | 20             | 20   |
| UiO-67     | 4.6                           | 77              | 38             | 21   |
| UiO-66     | 2.4                           | 77              | 38             | 21   |

**Table S5.** The adsorption selectivity for CO<sub>2</sub>/N<sub>2</sub>, CO<sub>2</sub>/CH<sub>4</sub>, CH<sub>4</sub>/N<sub>2</sub> and CO<sub>2</sub>/H<sub>2</sub> on previously reported MOF materials.

| Material                                      | Selectivity                                  |                                               |                                              |                                              | Temperatur<br>e<br>(K) | Pressure<br>(bar) | Ref. |
|-----------------------------------------------|----------------------------------------------|-----------------------------------------------|----------------------------------------------|----------------------------------------------|------------------------|-------------------|------|
|                                               | CO <sub>2</sub> /N <sub>2</sub> <sup>a</sup> | CO <sub>2</sub> /CH <sub>4</sub> <sup>a</sup> | CH <sub>4</sub> /N <sub>2</sub> <sup>a</sup> | CO <sub>2</sub> /H <sub>2</sub> <sup>a</sup> |                        |                   |      |
| UiO-66                                        | 28                                           |                                               |                                              |                                              | 298                    | 3                 | 22   |
| UiO-66-NH <sub>2</sub>                        | 68                                           |                                               |                                              |                                              | 298                    | 3                 | 22   |
| UiO-66-1,4-Naphyl                             | 32                                           |                                               |                                              |                                              | 298                    | 3                 | 22   |
| UiO-66-2,5-(OMe) <sub>2</sub>                 | 68                                           |                                               |                                              |                                              | 298                    | 3                 | 22   |
| UiO-66-NO <sub>2</sub>                        | 40                                           |                                               |                                              |                                              | 298                    | 3                 | 22   |
| [Mn(CIP <sup>-</sup> ) <sub>2</sub> ]         | 117                                          | 8                                             |                                              |                                              | 273                    | 1                 | 23   |
| ATC-Cu                                        |                                              |                                               | 9.7                                          |                                              | 298                    | 1                 | 24   |
| ZnZSM-5-pIM                                   |                                              |                                               | 8.44                                         |                                              | 298                    | 1                 | 25   |
| InOF-18                                       | 37.83                                        | 10.44                                         |                                              |                                              | 273                    | 1                 | 26   |
| UPC-99                                        | 150 <sup>b</sup>                             | 12.6                                          |                                              |                                              | 273                    | 1                 | 27   |
| NKU-521a                                      | 170                                          | 36                                            |                                              |                                              | 273                    | 1                 | 28   |
| Mg-MOF-74                                     |                                              | ~175                                          |                                              |                                              | 300                    | <1                | 29   |
| Zn-MOF-74                                     | 35 <sup>c</sup>                              | 10                                            |                                              |                                              | 300                    | <1                | 29   |
| IITKGP-8                                      | 106                                          | 17.7                                          |                                              |                                              | 273                    | 1                 | 30   |
| IITKGP-5                                      | 435.5                                        | 151.6                                         |                                              |                                              | 273                    | 1                 | 31   |
| UTSA-16                                       | 314.7                                        | 29.8                                          |                                              |                                              | 296                    | 1                 | 32   |
| SIFSIX-2-Cu-i                                 | 140                                          | 33                                            |                                              |                                              | 298                    | 1                 | 33   |
| 467-MOF                                       | <6                                           | <6 <sup>d</sup>                               |                                              | 45                                           | 273 or 293             | 1                 | 34   |
| [Cu(tba) <sub>2</sub> ] <sub>n</sub>          | 45                                           | 45 <sup>d</sup>                               |                                              | 51                                           | 293                    | 1                 | 35   |
| Cu-MOF <sup>e</sup>                           |                                              |                                               |                                              | 80                                           | 298                    | 10                | 36   |
| <sup>3</sup> <sub>∞</sub> [Cu(Me-4py-trz-ia)] |                                              |                                               | 4.0-4.4                                      |                                              | 298                    | 5                 | 37   |
| UMCM-1 <sup>e</sup>                           | 5.4 <sup>f</sup>                             | 2.9                                           | 2.0                                          | 16.4 <sup>g</sup>                            | 298                    | 40                | 38   |
| UMCM-2 <sup>e</sup>                           | 7.8 <sup>f</sup>                             | 4.7                                           | 2.0                                          | 26.9 <sup>g</sup>                            | 298                    | 40                | 38   |

<sup>a</sup> If not specially noted the selectivity is obtained from IAST calculations and the CO<sub>2</sub>/N<sub>2</sub>, CO<sub>2</sub>/CH<sub>4</sub>, CH<sub>4</sub>/N<sub>2</sub>, CO<sub>2</sub>/H<sub>2</sub> mixtures are 15/85, 50/50, 50/50 and 15/85 binary gas mixtures, respectively.

<sup>b</sup> 10/90 CO<sub>2</sub>/N<sub>2</sub> gas mixture.

<sup>c</sup> 20/80 CO<sub>2</sub>/N<sub>2</sub> gas mixture.

<sup>d</sup> 15/85 CO<sub>2</sub>/CH<sub>4</sub> gas mixture.

<sup>e</sup> Obtained from GCMC simulations.

<sup>f</sup> 50/50 CO<sub>2</sub>/N<sub>2</sub> gas mixture.

<sup>g</sup> 50/50 CO<sub>2</sub>/H<sub>2</sub> gas mixture.



| Bnn-1-Ca                                                                           |                 |                 | 10 <sup>4</sup> g |                    |     | 39 |
|------------------------------------------------------------------------------------|-----------------|-----------------|-------------------|--------------------|-----|----|
| Bnn-1-Ca-H <sub>2</sub> O                                                          | 10 <sup>6</sup> | 10 <sup>5</sup> |                   | 298                | 1   | 39 |
| MCM-41                                                                             | 15 <sup>c</sup> | 7               |                   | 65 <sup>h</sup>    | 298 | 45 |
| N-WAPC                                                                             |                 | 3.19            | 7.62              |                    | 298 | 1  |
| Lignite Coal                                                                       |                 |                 |                   |                    |     |    |
| Liquefaction                                                                       | 35 <sup>f</sup> | 11              | 38                |                    | 273 | 1  |
| CAU-21-BPDC                                                                        |                 |                 | 11.9              |                    | 298 | 1  |
| [Co <sub>3</sub> (C <sub>4</sub> O <sub>4</sub> ) <sub>2</sub> (OH) <sub>2</sub> ] |                 |                 | 12.5              |                    | 298 | 1  |
| UiO-66(Hf)-(OH) <sub>2</sub>                                                       | 93              | 30              | 3.6               | >1700 <sup>i</sup> | 298 | 1  |

---

<sup>h</sup> 20/80 CO<sub>2</sub>/H<sub>2</sub> gas mixture.

<sup>i</sup> 30/70 CO<sub>2</sub>/H<sub>2</sub> gas mixture.

## Reference

1. Materials Studio, Accelrys Software Inc., San Diego, CA 92121, USA.
2. X. Si, C. Jiao, F. Li, J. Zhang, S. Wang, S. Liu, Z. Li, L. Sun, F. Xu and Z. Gabelica, *Energy Environ. Sci.*, 2011, **4**, 4522-4527.
3. B. Wang, X. Zhang, H. Huang, Z. Zhang, T. Yildirim, W. Zhou, S. Xiang and B. Chen, *Nano Res.*, 2021, **14**, 507-511.
4. B. Panella, M. Hirscher, H. Pütter and U. Müller, *Adv. Funct. Mater.*, 2006, **16**, 520-524.
5. S. S. Kaye, A. Dailly, O. M. Yaghi and J. R. Long, *J. Am. Chem. Soc.*, 2007, **129**, 14176.
6. Z. Chen, P. Li, R. Anderson, X. Wang, X. Zhang, L. Robison, L. R. Redfern, S. Moribe, T. Islamoglu, D. A. Gomez-Gualdrón, T. Yildirim, J. F. Stoddart and O. K. Farha, *Science*, 2020, **368**, 297-303.
7. A. G. Wong-Foy, A. J. Matzger and O. M. Yaghi, *J. Am. Chem. Soc.*, 2006, **128**, 3494-3495.
8. Y.-G. Lee, H. R. Moon, Y. E. Cheon and M. P. Suh, *Angew. Chem. Int. Ed.*, 2008, **47**, 7741-7745.
9. H. J. Park and M. P. Suh, *Chem. Eur. J.*, 2008, **14**, 8812-8821.
10. M. Dincă, A. Dailly, Y. Liu, C. M. Brown, D. A. Neumann and J. R. Long, *J. Am. Chem. Soc.*, 2006, **128**, 16876-16883.
11. M. Dincă, W. S. Han, Y. Liu, A. Dailly, C. M. Brown and J. R. Long, *Angew. Chem. Int. Ed.*, 2007, **46**, 1419-1422.
12. K. Sumida, S. Horike, S. S. Kaye, Z. R. Herm, W. L. Queen, C. M. Brown, F. Grandjean, G. J. Long, A. Dailly and J. R. Long, *Chem. Sci.*, 2010, **1**, 184-191.
13. J. A. Villajos, G. Orcajo, C. Martos, J. Á. Botas, J. Villacañas and G. Calleja, *Int. J. Hydrogen Energy*, 2015, **40**, 5346-5352.
14. D. Sun, S. Ma, Y. Ke, D. J. Collins and H.-C. Zhou, *J. Am. Chem. Soc.*, 2006, **128**, 3896-3897.
15. S. Ma, D. Sun, M. Ambrogio, J. A. Fillinger, S. Parkin and H.-C. Zhou, *J. Am. Chem. Soc.*, 2007, **129**, 1858-1859.
16. X.-S. Wang, S. Ma, K. Rauch, J. M. Simmons, D. Yuan, X. Wang, T. Yildirim, W. C. Cole, J. J. López, A. d. Meijere and H.-C. Zhou, *Chem. Mat.*, 2008, **20**, 3145-3152.
17. X.-S. Wang, S. Ma, P. M. Forster, D. Yuan, J. Eckert, J. J. López, B. J. Murphy, J. B. Parise and H.-C. Zhou, *Angew. Chem. Int. Ed.*, 2008, **47**, 7263-7266.
18. X.-S. Wang, S. Ma, D. Yuan, J. W. Yoon, Y. K. Hwang, J.-S. Chang, X. Wang, M. R. Jørgensen, Y.-S. Chen and H.-C. Zhou, *Inorg. Chem.*, 2009, **48**, 7519-7521.
19. M. P. Suh, H. J. Park, T. K. Prasad and D.-W. Lim, *Chem. Rev.*, 2012, **112**, 782-835.
20. C. Tan, S. Yang, N. R. Champness, X. Lin, A. J. Blake, W. Lewis and M. Schröder, *Chem. Commun.*, 2011, **47**, 4487-4489.
21. S. Chavan, J. G. Vitillo, D. Gianolio, O. Zavorotynska, B. Civalieri, S. Jakobsen, M. H. Nilsen, L. Valenzano, C. Lamberti, K. P. Lillerud and S. Bordiga, *Phys. Chem. Chem. Phys.*, 2012, **14**, 1614-1626.
22. G. E. Cmarik, M. Kim, S. M. Cohen and K. S. Walton, *Langmuir*, 2012, **28**, 15606-15613.
23. D.-D. Feng, Y.-D. Zhao, X.-Q. Wang, D.-D. Fang, J. Tang, L.-M. Fan and J. Yang, *Dalton Trans.*, 2019, **48**, 10892-10900.
24. Z. Niu, X. Cui, T. Pham, P. C. Lan, H. Xing, K. A. Forrest, L. Wojtas, B. Space and S. Ma, *Angew. Chem. Int. Ed.*, 2019, **58**, 10138-10141.
25. Y. Wu, D. Yuan, D. He, J. Xing, S. Zeng, S. Xu, Y. Xu and Z. Liu, *Angew. Chem. Int. Ed.*, 2019, **58**,

- 10241-10244.
26. Z. Cao, L. Chen, F. Jiang, K. Zhou, M. Yu, T. Jing, S. Li, Z. Li and M. Hong, *Cryst. Growth Des.*, 2019, **19**, 3860-3868.
  27. X. Wang, X. Zhang, K. Zhang, X. Wang, Y. Wang, W. Fan and F. Dai, *Inorg. Chem. Front.*, 2019, **6**, 1152-1157.
  28. N. Li, Z. Chang, H. Huang, R. Feng, W.-W. He, M. Zhong, D. G. Madden, M. J. Zaworotko and X.-H. Bu, *Small*, 2019, **15**, 1900426.
  29. J. M. Simmons, H. Wu, W. Zhou and T. Yildirim, *Energy Environ. Sci.*, 2011, **4**, 2177-2185.
  30. S. Chand, A. Pal and M. C. Das, *Chem. Eur. J.*, 2018, **24**, 5982-5986.
  31. A. Pal, S. Chand, S. M. Elahi and M. C. Das, *Dalton Trans.*, 2017, **46**, 15280-15286.
  32. S. Xiang, Y. He, Z. Zhang, H. Wu, W. Zhou, R. Krishna and B. Chen, *Nat. Commun.*, 2012, **3**, 954.
  33. P. Nugent, Y. Belmabkhout, S. D. Burd, A. J. Cairns, R. Luebke, K. Forrest, T. Pham, S. Ma, B. Space, L. Wojtas, M. Eddaoudi and M. J. Zaworotko, *Nature*, 2013, **495**, 80-84.
  34. Z.-W. Wang, M. Chen, C.-S. Liu, X. Wang, H. Zhao and M. Du, *Chem. Eur. J.*, 2015, **21**, 17215-17219.
  35. M. Du, C.-P. Li, M. Chen, Z.-W. Ge, X. Wang, L. Wang and C.-S. Liu, *J. Am. Chem. Soc.*, 2014, **136**, 10906-10909.
  36. K. Zhang, A. Nalaparaju, Y. Chen and J. Jiang, *RSC Adv.*, 2013, **3**, 16152-16158.
  37. J. Möllmer, M. Lange, A. Möller, C. Patzschke, K. Stein, D. Lässig, J. Lincke, R. Gläser, H. Krautscheid and R. Staudt, *J. Mater. Chem.*, 2012, **22**, 10274-10286.
  38. X. Peng, X. Cheng and D. Cao, *J. Mater. Chem.*, 2011, **21**, 11259-11270.
  39. S. Mukherjee, S. Chen, A. A. Bezrukov, M. Mostrom, V. V. Terskikh, D. Franz, S.-Q. Wang, A. Kumar, M. Chen, B. Space, Y. Huang and M. J. Zaworotko, *Angew. Chem. Int. Edit.*, 2020, **59**, 16188-16194.
  40. Y. Belmabkhout and A. Sayari, *Chem. Eng. Sci.*, 2009, **64**, 3729-3735.
  41. Y. Li, R. Xu, B. B. Wang, J. P. Wei, L. Y. Wang, M. Q. Shen and J. Yang, *Nanomaterials*, 2019, **9**, 15.
  42. A. Ariunaa, S. Y. H. Liou, G. Tsatsral, B. Purevsuren, Y. Davaajav, R. W. Chang and C. J. Lin, *J. Taiwan Inst. Chem. Eng.*, 2018, **85**, 170-175.
  43. D. Lv, Y. Wu, J. Chen, Y. Tu, Y. Yuan, H. Wu, Y. Chen, B. Liu, H. Xi, Z. Li and Q. Xia, *AIChE J.*, 2020, DOI: 10.1002/aic.16287.
  44. L. Li, L. Yang, J. Wang, Z. Zhang, Q. Yang, Y. Yang, Q. Ren and Z. Bao, *AIChE J.*, 2018, **64**, 3681-3689.
  45. Z. Hu, A. Nalaparaju, Y. Peng, J. Jiang and D. Zhao, *Inorg. Chem.*, 2016, **55**, 1134-1141.
